# Supplementary material
Source: PubMed Central journal article supplement (PMC7309570)
Supplement: jamaneurol-e201782-s001.pdf [file jamaneurol-e201782-s001.pdf]

## Supplementary Online Content

Regenhardt RW, Thon JM, Das AS, et al. Association between immunosuppressive treatment and outcomes of cerebral amyloid angiopathy–related inflammation. *JAMA Neurol*. Published online June 22, 2020. doi:10.1001/jamaneurol.2020.1782

**eTable 1.** Clinical Presentation, Cerebrospinal Fluid, and Immunosuppressive Treatments After all Episodes Combined

**eTable 2.** Associations With Receiving Immunosuppressive Treatment for First Episode of Cerebral Amyloid Angiopathy–Related Inflammation

**eTable 3.** Sensitivity Analyses for Recurrence After the First Episode of Cerebral Amyloid Angiopathy–Related Inflammation According to Treatment With Immunosuppressive Agent

**eTable 4.** Associations of Clinical and Imaging Variables With Pathologic Vessel Wall Inflammation After First Episode of Cerebral Amyloid Angiopathy–Related Inflammation

This supplementary material has been provided by the authors to give readers additional information about their work.

**eTable 1.** Clinical Presentation, Cerebrospinal Fluid, and Immunosuppressive Treatments After all Episodes Combined

11 of 12 patients treated with cyclophosphamide were also treated with steroids. Other symptoms were atypical for CAA-ri, but additional symptoms or imaging was consistent with diagnostic criteria. Ct count, N total number with available information.

|                                     | <b>Total (Ct/N)</b> | <b>Total (%)</b> |
|-------------------------------------|---------------------|------------------|
| Clinical Presentation, All Episodes |                     |                  |
| Headache                            | 26/67               | 39               |
| Cognitive/Behavioral Change         | 40/67               | 60               |
| Focal Deficit                       | 11/67               | 16               |
| Seizure                             | 23/67               | 34               |
| Other                               | 9/67                | 13               |
| Cerebrospinal Fluid, All Episodes   |                     |                  |
| Nucleated Cells >5/ $\mu$ L         | 9/28                | 32               |
| Protein >45mg/dL                    | 29/31               | 94               |
| Normal                              | 1/28                | 3                |

**eTable 2.** Associations With Receiving Immunosuppressive Treatment for First Episode of Cerebral Amyloid Angiopathy–Related Inflammation

5 of 6 patients treated with cyclophosphamide were also treated with steroids. *A priori* selected variables with  $P < 0.10$  in univariate analyses were included in multivariate analyses. CSF cerebrospinal fluid, OR odds ratio, CI confidence interval.

|                              | <b>OR (95% CI)</b> | <b>P</b> |
|------------------------------|--------------------|----------|
| <b>Univariate</b>            |                    |          |
| Age (per year)               | 1.01 (0.95-1.08)   | >0.2     |
| APOE ε4 (per allele)         | 2.53 (0.95-6.76)   | 0.064    |
| Any Vessel Wall Inflammation | 3.00 (0.28-32.2)   | >0.2     |
| CSF Nucleated Cells >5       | 0.27 (0.03-2.53)   | >0.2     |
| T1 Contrast Enhancement      | 0.83 (0.15-4.54)   | >0.2     |
| Fazekas Score                | 0.91 (0.32-2.59)   | >0.2     |
| Acute Infarcts               | 0.97 (0.15-6.23)   | >0.2     |
| Lacunae                      | 0.35 (0.04-2.98)   | >0.2     |
| Microbleeds>50               | 3.50 (0.59-20.7)   | 0.168    |
| Headache                     | 1.42 (0.39-5.14)   | >0.2     |
| Cognitive/Behavioral Change  | 3.76 (1.02-13.9)   | 0.047    |
| Focal Deficit                | 0.13 (0.03-0.63)   | 0.012    |
| Seizure                      | 2.22 (0.58-8.49)   | >0.2     |
| <b>Multivariate</b>          |                    |          |
| APOE ε4                      | 3.62 (0.94-14.0)   | 0.061    |
| Cognitive/Behavioral         | 10.3 (1.19-88.6)   | 0.034    |
| Focal Deficit                | 0.06 (0.00-1.63)   | 0.096    |

**eTable 3.** Sensitivity Analyses for Recurrence After the First Episode of Cerebral Amyloid Angiopathy–  
Related Inflammation According to Treatment With Immunosuppressive Agent

Ct count, N total number with available information, HR hazard ratio.

|                             | <b>Total</b> |          | <b>No<br/>Immunosuppression</b> |          | <b>Any<br/>Immunosuppression</b> |          | <b>HR (95% CI)</b> | <b>P</b> |
|-----------------------------|--------------|----------|---------------------------------|----------|----------------------------------|----------|--------------------|----------|
|                             | <b>Ct/N</b>  | <b>%</b> | <b>Ct/N</b>                     | <b>%</b> | <b>Ct/N</b>                      | <b>%</b> |                    |          |
| Including All Recurrences   | 19/48        | 40       | 10/14                           | 71       | 9/34                             | 26       | 0.19 (0.07-0.48)   | <0.0001  |
| Excluding Recurrences <1 Mo | 17/46        | 37       | 8/12                            | 67       | 9/34                             | 26       | 0.22 (0.08-0.59)   | 0.003    |
| Excluding Recurrences <2 Mo | 13/42        | 31       | 5/9                             | 56       | 8/33                             | 24       | 0.27 (0.09-0.86)   | 0.026    |

**eTable 4.** Associations of Clinical and Imaging Variables With Pathologic Vessel Wall Inflammation After First Episode of Cerebral Amyloid Angiopathy–Related Inflammation

CSF cerebrospinal fluid, OR odds ratio, CI confidence interval.

|                         | <b>OR (95% CI)</b> | <b>P</b> |
|-------------------------|--------------------|----------|
| Age                     | 1.06 (0.95-1.18)   | >0.2     |
| APOE ε4                 | 0.67 (0.15-3.08)   | >0.2     |
| CSF Nucleated Cells >5  | 4.00 (0.21-75.7)   | >0.2     |
| T1 Contrast Enhancement | 2.00 (0.18-22.1)   | >0.2     |
| Fazekas Total           | 0.73 (0.19-2.80)   | >0.2     |
| Acute Infarcts          | 13.5 (0.88-208)    | 0.062    |
| Lacunae                 | 6.00 (0.39-92.3)   | 0.199    |
| Microbleeds>50          | 0.50 (0.04-6.68)   | >0.2     |
